# Supplementary material for: Patient involvement in preparing health research peer-reviewed publications or results summaries: a systematic review and evidence-based recommendations
Source: PubMed Central journal article supplement (PMC7313171; doi:10.1186/s40900-020-00190-w), 2020-06-24
Supplement: 40900_2020_190_MOESM5_ESM.pdf [file 40900_2020_190_MOESM5_ESM.pdf]



POWERING  
**PATIENT VOICES**

**Patient Authorship  
Experience Tool**  
(Non-patient author version)

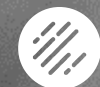

**ENVISION PHARMA  
GROUP**

Driven by evidence, enabled by technology

# Patient authorship experience tool – a pilot test

- Currently, there is no validated ‘quick and easy’ tool to gain feedback directly from patient and non-patient authors on their experience when working together, as co-authors, on a publication .
- What is available?
  - The not-for-profit organization, Patient Focused Medicines Development, has developed a comprehensive assessment tool (17 pages; Patient Engagement Quality Guidance Tool [PEQG] to assess ongoing or completed patient engagement projects). This text-based tool is robust, but may take hours for authors to complete, and it is not focused on publications.
  - The Guidance for Reporting Involvement of Patients and the Public 2 (GRIPP2) checklist identifies what should be reported in publications and where. This checklist was primarily designed to facilitate reporting of PPI in publications; it was not designed to investigate the patient authorship experience.
- To help gain feedback directly, quickly, and easily on the patient authorship experience, we have developed a bipolar, 5-point, psychometric Likert scale\*.
  - **The tool has two versions**
    1. **For patient authors to complete**
    2. **For non-patient authors to complete**
  - The tool is based on the PEQG, but focuses on the patient authorship experience. This tool is NOT intended to replace the PEQG tool or GRIPP2 guidelines.
  - The tool will be piloted with patient and non-patient authors as part of a co-creation process.

*\* To avoid left-to-right bias, the highest ratings have been positioned on the far right of the scale. Text descriptors have been included in each tick box to reinforce the direction of the scale.*

# Patient Authorship Experience Tool: **Non-Patient Author Version**

Patients can be authors of peer-reviewed publications in scientific journals. However, patient authorship is still uncommon. We are keen to know how to make the authorship experience a positive one for **all** authors. This tool has been designed to gain feedback directly from non-patient authors about their authorship experience. Your feedback may help improve the authorship experience for patient and non-patient authors.

**Name (desired, but optional):**

**Please circle the answer that best describes the number of peer-reviewed publications you authored before this publication**

|   |     |      |            |
|---|-----|------|------------|
| 0 | 1-5 | 6-10 | 11 or more |
|---|-----|------|------------|

**Please read each statement, then circle the answer that describes how much you disagree or agree with the statement**

| Statement                                                            | Strongly Disagree | Disagree | Neutral | Agree | Strongly Agree |
|----------------------------------------------------------------------|-------------------|----------|---------|-------|----------------|
| <b>1. Shared purpose</b>                                             |                   |          |         |       |                |
| a. Along with my co-authors, I understood the aim of the publication | Strongly disagree | Disagree | Neutral | Agree | Strongly agree |
| b. I understood the importance of having a patient author            | Strongly disagree | Disagree | Neutral | Agree | Strongly agree |

| Statement                                                                                                                                             | Strongly Disagree | Disagree | Neutral | Agree | Strongly Agree |
|-------------------------------------------------------------------------------------------------------------------------------------------------------|-------------------|----------|---------|-------|----------------|
| <b>2. Respect and accessibility</b>                                                                                                                   |                   |          |         |       |                |
| a. Patient authors were treated with respect during the development of the publication                                                                | Strongly disagree | Disagree | Neutral | Agree | Strongly agree |
| b. Patient authors' ability to access and share information was taken into account (eg, ability to attend authors meetings, time to review documents) | Strongly disagree | Disagree | Neutral | Agree | Strongly agree |
| <b>3. Representativeness of stakeholders</b>                                                                                                          |                   |          |         |       |                |
| a. The authorship group reflected the needs and interests of the end users of the publication                                                         | Strongly disagree | Disagree | Neutral | Agree | Strongly agree |
| b. Patient authors represented patients who may be interested in being authors                                                                        | Strongly disagree | Disagree | Neutral | Agree | Strongly agree |
| <b>4. Roles and responsibilities</b>                                                                                                                  |                   |          |         |       |                |
| a. Patient authors understood their roles and responsibilities of being an author, as outlined in the written authorship agreement form               | Strongly disagree | Disagree | Neutral | Agree | Strongly agree |
| b. Patient authors were able to meet the four criteria for authorship, as outlined in the written authorship agreement form                           | Strongly disagree | Disagree | Neutral | Agree | Strongly agree |
| <b>5. Capacity and capability for engagement</b>                                                                                                      |                   |          |         |       |                |
| a. Patient authors had sufficient time to make a useful contribution to the publication                                                               | Strongly disagree | Disagree | Neutral | Agree | Strongly agree |
| b. Patient authors had sufficient insights, from the patient perspective, to make a useful contribution to the publication                            | Strongly disagree | Disagree | Neutral | Agree | Strongly agree |

| Statement                                                                                                                                                                                              | Strongly Disagree | Disagree | Neutral | Agree | Strongly Agree |
|--------------------------------------------------------------------------------------------------------------------------------------------------------------------------------------------------------|-------------------|----------|---------|-------|----------------|
| <b>6. Transparency in communication and documentation</b>                                                                                                                                              |                   |          |         |       |                |
| a. Communication among authors was open and honest                                                                                                                                                     | Strongly disagree | Disagree | Neutral | Agree | Strongly agree |
| b. Documents (eg, outlines, drafts, minutes) were shared appropriately                                                                                                                                 | Strongly disagree | Disagree | Neutral | Agree | Strongly agree |
| <b>7. Continuity and sustainability</b>                                                                                                                                                                |                   |          |         |       |                |
| a. I understood the main stages involved in preparing a publication                                                                                                                                    | Strongly disagree | Disagree | Neutral | Agree | Strongly agree |
| b. Efforts were made to nurture relationships among the authorship group so that future projects may be considered                                                                                     | Strongly disagree | Disagree | Neutral | Agree | Strongly agree |
| <b>8. Results and outcomes</b>                                                                                                                                                                         |                   |          |         |       |                |
| a. The research reported in this publication could have a positive impact on stakeholders (eg, patients, researchers)                                                                                  | Strongly disagree | Disagree | Neutral | Agree | Strongly agree |
| b. Efforts were made to learn from patients about their authorship experience                                                                                                                          | Strongly disagree | Disagree | Neutral | Agree | Strongly agree |
| <b>Final score</b><br>To calculate the final score, add up the individual scores for each question (strongly disagree = 1; strongly agree = 5) and calculate a percentage out of a maximum score of 80 |                   |          |         |       |                |

**Please add any other feedback here**
